# Supplementary material for: Differential Lyn-dependence of the SHIP1-deficient mast cell phenotype
Source: PubMed Central journal article supplement (PMC4874025; doi:10.1186/s12964-016-0135-0), 2016-05-20

# Differential Lyn-dependence of the SHIP1-deficient mast cell phenotype

## Suppl. Figure 5

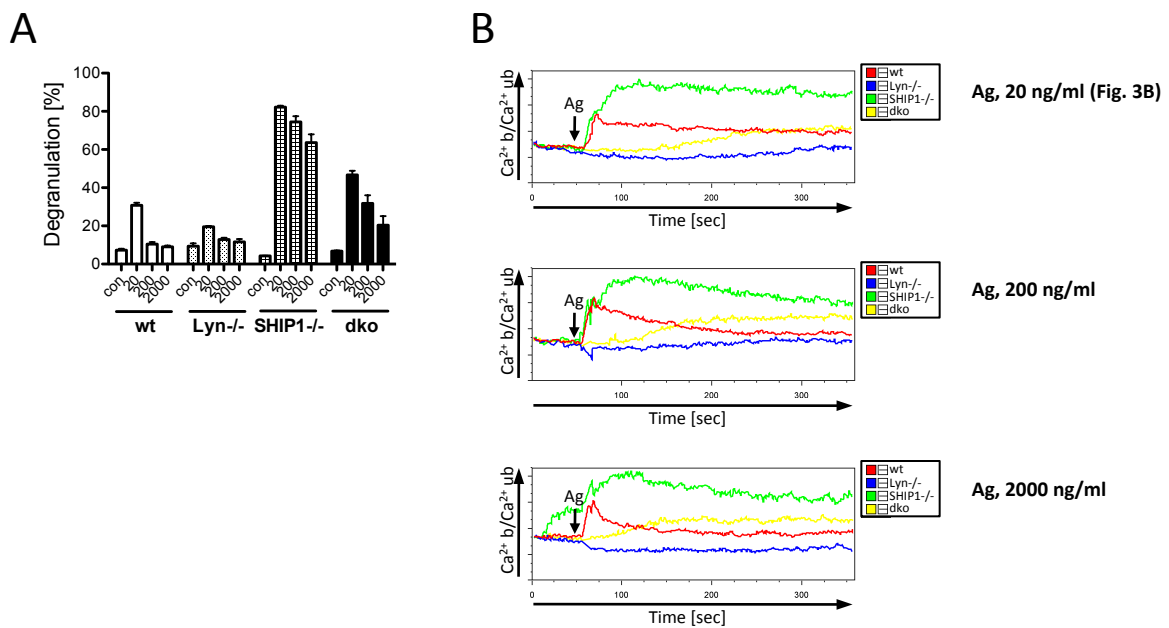

Supplement: 12964_2016_135_MOESM5_ESM.pdf [file 12964_2016_135_MOESM5_ESM.pdf]
